# Supplementary material for: From luminescence quenching to high-efficiency phosphorescence: a theoretical study on the monomeric and dimeric forms of platinum(ii) complexes with both 2-pyridylimidazol-2-ylidene and bipyrazolate chelates
Source: Royal Society of Chemistry journal article supplement (doi:10.1039/d0cp06269c), 2021-01-01
Supplement: d0cp06269c1.pdf [file d0cp06269c1.pdf]

## Supporting Information

### **From Luminescence Quenching to High-efficiency Phosphorescence: A Theoretical Study on the Monomer to Dimer of Platinum (II) Complexes with Both 2-Pyridylimidazol-2-ylidene and Bipyrazolate Chelates**

Bo-Hua Zhang,<sup>a</sup> Jun-An Li,<sup>b</sup> Min Wang,<sup>c</sup> Teng-Fei He,<sup>a</sup> Pan-Pan Lin,<sup>a</sup> Yun-Li Zhang,<sup>a</sup> Ai-Min Ren,<sup>a</sup> and Lu-Yi Zou<sup>a\*</sup>

<sup>a</sup>Laboratory of Theoretical and Computational Chemistry, Institute of Theoretical Chemistry, Jilin University, Changchun 130023, P. R. China.

<sup>b</sup>Gastroenterology and center of Digestive Endoscopy, The Second Hospital of Jilin University, 218Ziqiang Street, Changchun 130041, P. R. China.

<sup>c</sup>Department of Prosthodontics, School of Stomatology, Jilin University, Changchun 130021, P. R. China.

\*Corresponding author E-mail addresses: [zouly@jlu.edu.cn](mailto:zouly@jlu.edu.cn).

## Computational details

The displacement ( $\Delta Q$ ) of any molecular structure can be obtained from eqn (I), which is the projection we mentioned, and then by the eqn (II) can get reorganization energy  $\lambda$ .

$$\Delta Q = C^T m^{1/2} (R - R_0) \dots \dots \dots (I)$$

$$\lambda = \sum_i \lambda_i = \sum_i 1/2 \omega_i^2 \Delta Q_i^2 \dots \dots \dots (II)$$

Here, the  $C^T$  represents the matrix of the normal modes obtained by the optimized single molecule,  $R_0$  represents the Cartesian coordinates of the optimized single molecule, and  $R$  represents the Cartesian coordinates of any molecular structure. Therefore,  $R$  here is the Cartesian coordinates of the excited state optimized structure,  $R_0$  is the Cartesian coordinates of the ground state optimized structure.

We have carried out a vertical displacement operation on the geometry of the excited state of the dimer, and freezing operation is adopted for the whole molecular skeleton of the geometry structure obtained by each operation. The local geometry optimization is carried out to ensure that the most stable geometric junction is obtained under fixed molecular distance. After that, the single point energy of each geometry is calculated.

The crystal structure is essential to calculate the luminescent properties of aggregates. Among all molecules studied, only complex **4** can grow a single crystal. Therefore, we focus on complex **4** with the experimental crystal structure.

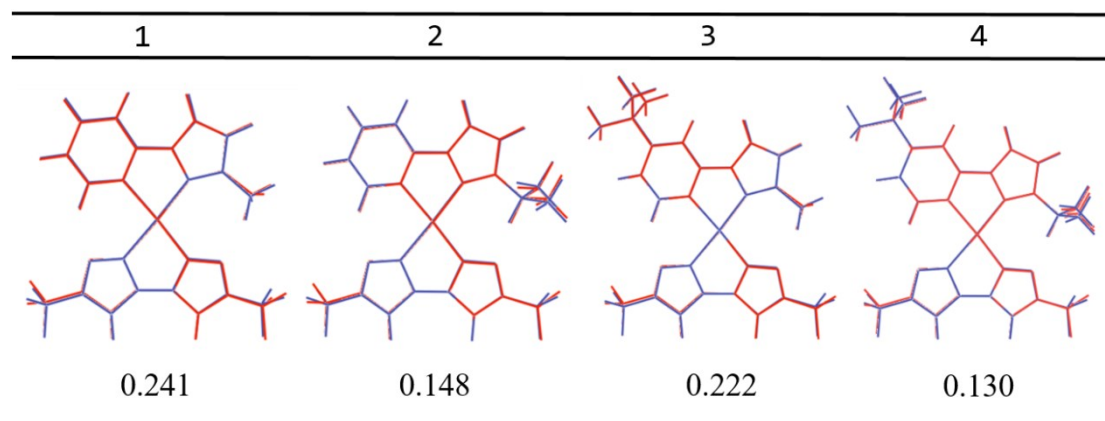

**Fig. S1.** Geometrically superimposed structures of  $S_0$  (blue) and  $T_1$  (red) states of the studied complexes.

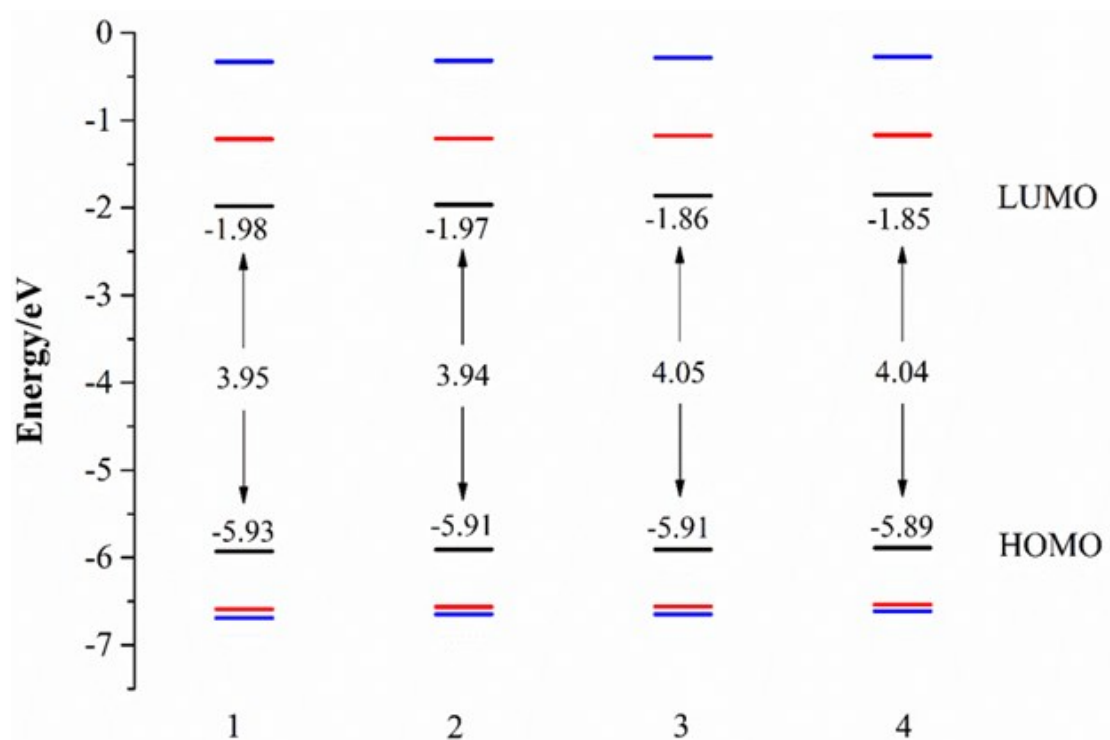

**Fig. S2.** Frontier molecular orbitals energy levels and the HOMO and LUMO energy gaps of monomers 1-4.

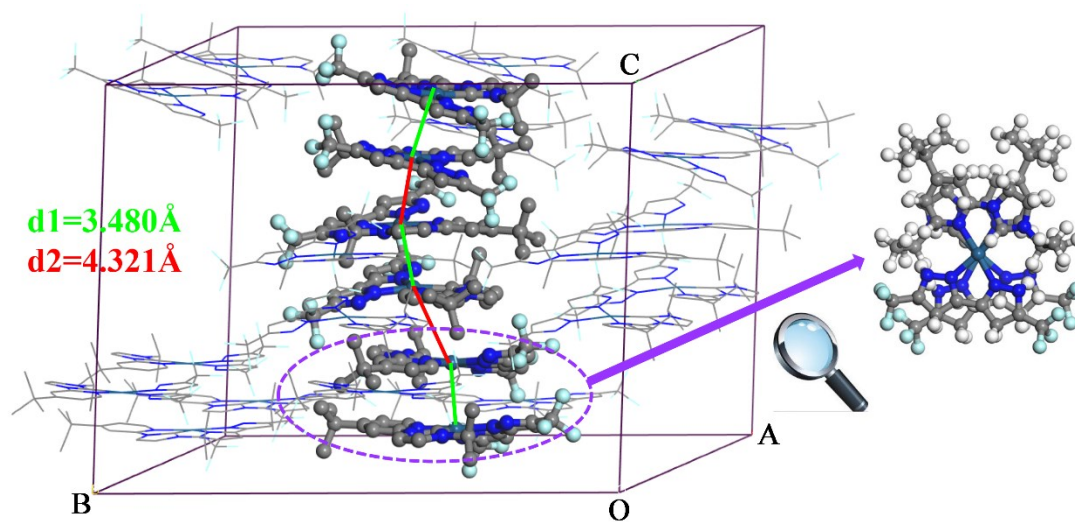

**Fig. S3.** Molecular stacking diagram with Pt $\cdots$ Pt contacts of 3.480(4)  $\text{\AA}$  and 4.3214(4)  $\text{\AA}$  and Pt $\cdots$ Pt $\cdots$ Pt angle of 154.4 $^\circ$  and Top view.

**Table S1.** Optimized geometric parameters at the S<sub>0</sub> state of monomer **4** by different functionals as well as the experimental bond lengths (Å) and dihedral angles (°)

|                                                  | B3LYP-<br>D3(BJ) | PBE0<br>-D3(BJ) | M062X<br>-D3(BJ) | CAM-B3LYP<br>-D3(BJ) | ωB97XD | Exp. <sup>a</sup> |
|--------------------------------------------------|------------------|-----------------|------------------|----------------------|--------|-------------------|
| Pt-N <sub>1</sub>                                | 2.0783           | 2.0531          | 2.0857           | 2.0677               | 2.0741 | 2.0326            |
| Pt-C <sub>4</sub>                                | 2.0105           | 1.9967          | 2.0025           | 2.0109               | 2.0111 | 1.9870            |
| Pt-N <sub>5</sub>                                | 2.0390           | 2.0194          | 2.0403           | 2.0281               | 2.0318 | 2.0191            |
| Pt-N <sub>4</sub>                                | 2.0815           | 2.0591          | 2.0914           | 2.0668               | 2.0740 | 2.0524            |
| C <sub>3</sub> -N <sub>2</sub>                   | 1.3988           | 1.3921          | 1.4015           | 1.3980               | 1.3985 | 1.3934            |
| C <sub>5</sub> -C <sub>6</sub>                   | 1.4443           | 1.4411          | 1.4514           | 1.4471               | 1.4476 | 1.4528            |
| C <sub>1</sub> -C <sub>R'</sub>                  | 1.5286           | 1.5219          | 1.5253           | 1.5253               | 1.5279 | 1.5360            |
| N <sub>3</sub> -C <sub>R''</sub>                 | 1.4801           | 1.4700          | 1.4774           | 1.4757               | 1.4748 | 1.4984            |
| N <sub>1</sub> -Pt-C <sub>4</sub>                | 78.6             | 78.8            | 78.5             | 78.6                 | 78.5   | 78.9              |
| C <sub>4</sub> -Pt-N <sub>5</sub>                | 105.5            | 105.2           | 105.5            | 105.3                | 105.6  | 105.8             |
| N <sub>4</sub> -Pt-N <sub>5</sub>                | 77.3             | 77.6            | 77.4             | 77.5                 | 77.4   | 77.8              |
| N <sub>1</sub> -Pt-N <sub>4</sub>                | 98.7             | 98.5            | 98.7             | 98.7                 | 98.6   | 98.0              |
| C <sub>R'</sub> -C <sub>1</sub> -C <sub>2</sub>  | 119.8            | 119.9           | 119.6            | 119.8                | 119.8  | 120.1             |
| C <sub>R''</sub> -N <sub>3</sub> -C <sub>4</sub> | 123.2            | 122.7           | 123.3            | 123.1                | 123.1  | 122.2             |
| Relative Error                                   | 0.83%            | 0.55%           | 0.88%            | 0.72%                | 0.76%  | --                |
| RMSD                                             | 0.520            | 0.516           | 0.533            | 0.521                | 0.519  | --                |

<sup>a</sup> Experimental values.

**Table S2.** The emission spectra  $\lambda_{em}$  (nm) obtained by TDDFT method with different functionals for dimer **4** (basis set: 6-31+G\*/ma-def2-TZVP).

|                       | B3LYP<br>-D3(BJ) | PBE0<br>-D3(BJ) | M062X<br>-D3(BJ) | CAM-B3LYP<br>-D3(BJ) | $\omega$ B97XD | Exp. <sup>a</sup> |
|-----------------------|------------------|-----------------|------------------|----------------------|----------------|-------------------|
| $T_1 \rightarrow S_0$ | 1200.6           | 1033.4          | 546.8            | 602.2                | 514.5          | 501.0             |

<sup>a</sup> Experimental values.

**Table S3.** Frontier molecular orbital energies (eV) and compositions (%) of different fragments in the optimized  $S_0$  state geometries for the monomers **1-4** calculated by PBE0-D3(BJ).

|          | MO  | Energy<br>(eV) | Pt<br>contribution (%)              | Pyim<br>contribution<br>(%) | Bipz<br>contribution<br>(%) |
|----------|-----|----------------|-------------------------------------|-----------------------------|-----------------------------|
| <b>1</b> | L+1 | -1.215         | 1.6                                 | 98.0                        | 0.4                         |
|          | L   | -1.981         | 7.8(3.8 $d_{yz}$ )                  | 87.2                        | 5.0                         |
|          | H   | -5.929         | 6.7                                 | 1.2                         | 92.0                        |
|          | H-1 | -6.590         | 34.6 (21.5 $d_{xz}$ +13 $d_{yz}$ )  | 19                          | 46.4                        |
|          | H-2 | -6.691         | 39(13.2 $d_{xz}$ +25.4 $d_{yz}$ )   | 8.9                         | 52                          |
| <b>2</b> | L+1 | -1.207         | 1.7                                 | 97.9                        | 0.4                         |
|          | L   | -1.965         | 7.7(3.9 $d_y$ )                     | 87.3                        | 5.0                         |
|          | H   | -5.908         | 6.7                                 | 1.7                         | 91.5                        |
|          | H-1 | -6.564         | 34.5 (30 $d_{xz}$ +4.3 $d_{yz}$ )   | 19.5                        | 45.9                        |
|          | H-2 | -6.649         | 39.1(4 $d_{xy}$ +34.5 $d_{yz}$ )    | 9.6                         | 51.2                        |
| <b>3</b> | L+1 | -1.176         | 1.5                                 | 98.1                        | 0.3                         |
|          | L   | -1.861         | 7.7(2.2 $d_{xz}$ +1.5 $d_{yz}$ )    | 86.9                        | 5.4                         |
|          | H   | -5.907         | 7.1(3.8 $d_{xz}$ +3.3 $d_{yz}$ )    | 1.3                         | 91.6                        |
|          | H-1 | -6.560         | 35.1 (1.1 $d_{xz}$ +33.9 $d_{yz}$ ) | 19.9                        | 45.1                        |
|          | H-2 | -6.649         | 40.1(37.8 $d_{xz}$ +1.8 $d_{yz}$ )  | 9.6                         | 50.4                        |
| <b>4</b> | L+1 | -1.169         | 1.6                                 | 98.0                        | 0.4                         |
|          | L   | -1.849         | 7.8(3.8 $d_{yz}$ )                  | 87.0                        | 5.4                         |
|          | H   | -5.888         | 7.0(4.5 $d_{xz}$ +2.5 $d_{yz}$ )    | 1.8                         | 91.2                        |
|          | H-1 | -6.539         | 34.9 (3.3 $d_{xz}$ +31.5 $d_{yz}$ ) | 20.4                        | 44.6                        |
|          | H-2 | -6.613         | 39.8(34.4 $d_{xz}$ +4.6 $d_{yz}$ )  | 10.3                        | 50.0                        |

**Table S4.** Frontier molecular orbital energies (eV) and compositions (%) of different fragments in the optimized T<sub>1</sub> state geometries for the monomers of **1-4** calculated by PBE0-D3(BJ).

|   | <b>MO</b> | <b>Energy (eV)</b> | <b>Pt contribution (%)</b>       | <b>Pyim contribution (%)</b> | <b>Bipz contribution (%)</b> |
|---|-----------|--------------------|----------------------------------|------------------------------|------------------------------|
| 1 | L+2       | -0.466             | 14.3(5.1 $d_{xy}$ )              | 47.2                         | 38.6                         |
|   | L         | -2.223             | 8.7(4.6 $d_{yz}$ )               | 86.0                         | 5.4                          |
|   | H         | -5.360             | 4.4(4.3 $d_{xz}$ )               | 0.9                          | 94.7                         |
| 2 | L+2       | -0.441             | 15.6((5.8 $d_{xy}$ )             | 45.8                         | 38.6                         |
|   | L         | -2.194             | 8.5(4.6 $d_{yz}$ )               | 86.1                         | 5.3                          |
|   | H         | -5.332             | 4.3(3.9 $d_{xz}$ )               | 1.4                          | 94.3                         |
| 3 | L+2       | -0.435             | 13.3((4.6 $d_x^2-y^2$ )          | 98.1                         | 0.3                          |
|   | L         | -2.094             | 8.6(2.6 $d_{xz}$ +1.7 $d_{yz}$ ) | 86.9                         | 5.4                          |
|   | H         | -5.339             | 4.5(2.3 $d_{xz}$ +2.2 $d_{yz}$ ) | 1.3                          | 91.6                         |
| 4 | L+2       | -0.415             | 14.8((5.9 $d_x^2-y^2$ )          | 45.3                         | 40.0                         |
|   | L         | -2.065             | 8.2(2.1 $d_{xz}$ +2.1 $d_{yz}$ ) | 85.5                         | 6.0                          |
|   | H         | -5.314             | 4.4(2.8 $d_{xz}$ +1.5 $d_{yz}$ ) | 1.5                          | 94.0                         |

**Table S5.** Transition dipole moments  $M_{S_m}$  (a.u.) for  $S_m \rightarrow S_0$  transitions, singlet-triplet splitting energies  $\Delta E(S_m-T_1)$  (eV) and SOC matrix elements  $\langle T_1^\alpha | H_{SOC} | S_m \rangle$  ( $\text{cm}^{-1}$ ) of monomers **1-4** at their respective  $T_1$ -optimized geometries are calculated.

| <b>1</b>        |           | $E(T_1) = 17\,340\text{ cm}^{-1}$ |                                              | <b>2</b>        |           | $E(T_1) = 17\,423\text{ cm}^{-1}$ |                                              |
|-----------------|-----------|-----------------------------------|----------------------------------------------|-----------------|-----------|-----------------------------------|----------------------------------------------|
| $S_m$           | $M_{S_m}$ | $\Delta E(S_m-T_1)$               | $\langle T_1^\alpha   H_{SOC}   S_m \rangle$ | $S_m$           | $M_{S_m}$ | $\Delta E(S_m-T_1)$               | $\langle T_1^\alpha   H_{SOC}   S_m \rangle$ |
| S <sub>1</sub>  | 0.0101    | 1857                              | 12.358                                       | S <sub>1</sub>  | 0.0101    | 1899                              | 14.746                                       |
| S <sub>2</sub>  | 0.0085    | 10729                             | 203.047                                      | S <sub>2</sub>  | 0.0076    | 10692                             | 201.262                                      |
| S <sub>3</sub>  | 0.3069    | 10943                             | 82.609                                       | S <sub>3</sub>  | 0.2609    | 10950                             | 85.817                                       |
| S <sub>4</sub>  | 2.3512    | 12886                             | 253.867                                      | S <sub>4</sub>  | 1.8094    | 12853                             | 251.256                                      |
| S <sub>5</sub>  | 0.1911    | 13073                             | 818.565                                      | S <sub>5</sub>  | 0.7082    | 13215                             | 812.344                                      |
| S <sub>6</sub>  | 0.2357    | 14797                             | 54.948                                       | S <sub>6</sub>  | 0.3001    | 14803                             | 59.177                                       |
| S <sub>7</sub>  | 0.5218    | 16699                             | 216.982                                      | S <sub>7</sub>  | 0.5088    | 16935                             | 210.638                                      |
| S <sub>8</sub>  | 0.4678    | 18470                             | 99.243                                       | S <sub>8</sub>  | 0.5528    | 18464                             | 86.089                                       |
| S <sub>9</sub>  | 0.0899    | 19818                             | 21.378                                       | S <sub>9</sub>  | 0.0554    | 20000                             | 15.296                                       |
| S <sub>10</sub> | 0.7061    | 20059                             | 39.848                                       | S <sub>10</sub> | 0.7404    | 20040                             | 37.084                                       |
| <b>3</b>        |           | $E(T_1) = 17\,825\text{ cm}^{-1}$ |                                              | <b>4</b>        |           | $E(T_1) = 17\,931\text{ cm}^{-1}$ |                                              |
| $S_m$           | $M_{S_m}$ | $\Delta E(S_m-T_1)$               | $\langle T_1^\alpha   H_{SOC}   S_m \rangle$ | $S_m$           | $M_{S_m}$ | $\Delta E(S_m-T_1)$               | $\langle T_1^\alpha   H_{SOC}   S_m \rangle$ |
| S <sub>1</sub>  | 0.0108    | 2209                              | 11.289                                       | S <sub>1</sub>  | 0.0115    | 2172                              | 17.524                                       |
| S <sub>2</sub>  | 0.0078    | 10403                             | 51.496                                       | S <sub>2</sub>  | 0.0092    | 10247                             | 145.615                                      |
| S <sub>3</sub>  | 0.3163    | 11244                             | 47.476                                       | S <sub>3</sub>  | 0.2763    | 11163                             | 143.933                                      |
| S <sub>4</sub>  | 2.9157    | 12873                             | 244.393                                      | S <sub>4</sub>  | 2.7632    | 12831                             | 247.095                                      |
| S <sub>5</sub>  | 0.1754    | 13419                             | 378.342                                      | S <sub>5</sub>  | 0.2870    | 13421                             | 768.871                                      |
| S <sub>6</sub>  | 0.3550    | 14596                             | 621.390                                      | S <sub>6</sub>  | 0.4382    | 14461                             | 151.378                                      |
| S <sub>7</sub>  | 0.5792    | 16392                             | 311.106                                      | S <sub>7</sub>  | 0.5916    | 16529                             | 179.403                                      |
| S <sub>8</sub>  | 0.4276    | 18649                             | 16.480                                       | S <sub>8</sub>  | 0.4756    | 18556                             | 92.451                                       |
| S <sub>9</sub>  | 0.6631    | 19605                             | 22.357                                       | S <sub>9</sub>  | 0.7818    | 19476                             | 19.631                                       |
| S <sub>10</sub> | 0.0414    | 20061                             | 38.943                                       | S <sub>10</sub> | 0.0278    | 20112                             | 32.483                                       |

**Table S7.** The calculated triplet optical properties of the vertical displacement of the dimer **4**

|                                  |           |           |           |           |
|----------------------------------|-----------|-----------|-----------|-----------|
| <b>Pt...Pt (Å)</b>               | 2.42      | 2.62      | 2.82      | 3.02      |
| <b>λ (nm)</b>                    | 1900.0    | 907.9     | 637.3     | 514.5     |
| <b>E-LUMO (eV)</b>               | -1.42     | -1.26     | -1.14     | -1.05     |
| <b>E<sub>gap</sub> (eV)</b>      | 4.56      | 4.86      | 5.10      | 5.28      |
| <b>E-HOMO (eV)</b>               | -5.98     | -6.13     | -6.24     | -6.33     |
| <b><sup>a</sup>Spe (Hartree)</b> | -3982.381 | -3982.472 | -3982.522 | -3982.539 |
| <b>Excitation energies(eV)</b>   | 0.65      | 1.37      | 1.94      | 2.41      |
| <b>Pt...Pt (Å)</b>               | 3.22      | 3.42      | 3.62      | 3.82      |
| <b>λ (nm)</b>                    | 489.6     | 474.4     | 468.5     | 461.1     |
| <b>E-LUMO (eV)</b>               | -0.97     | -0.92     | -0.87     | -0.83     |
| <b>E<sub>gap</sub> (eV)</b>      | 5.43      | 5.54      | 5.63      | 5.67      |
| <b>E-HOMO (eV)</b>               | -6.40     | -6.45     | -6.50     | -6.50     |
| <b>Spe (Hartree)</b>             | -3982.538 | -3982.527 | -3982.521 | -3982.502 |
| <b>Excitation energies(eV)</b>   | 0.65      | 1.37      | 1.94      | 2.41      |

<sup>a</sup> Single point energy.



**Table S8.** Frontier molecular orbital energies(eV) and compositions (%) of different fragments in the optimized T<sub>1</sub> geometries calculated by ωB97XD for the monomer and dimer of complex **4**.

|         | MO     | Energy (eV)                                                                    | Pt contribution (%)                                                             | Pyim contribution (%) | Bipz contribution (%) |
|---------|--------|--------------------------------------------------------------------------------|---------------------------------------------------------------------------------|-----------------------|-----------------------|
| Monomer | L+4    | 2.128                                                                          | 25.1(2.5d <sub>yz</sub> )                                                       | 48.2                  | 26.7                  |
|         | L+2    | 1.376                                                                          | 16.3(1.7dx <sup>2</sup> -y <sup>2</sup> )                                       | 44.2                  | 38.5                  |
|         | L+1    | 0.583                                                                          | 2.4                                                                             | 97.1                  | 0.4                   |
|         | L      | -0.500                                                                         | 9.4(2.0d <sub>xz</sub> +1.9d <sub>yz</sub> )                                    | 87.1                  | 4.5                   |
|         | H      | -6.945                                                                         | 3.1(1.9d <sub>xz</sub> +1.2d <sub>yz</sub> )                                    | 0.7                   | 96.2                  |
|         | H-1    | -8.387                                                                         | 37.8(36.9d <sub>yz</sub> )                                                      | 30.8                  | 31.4                  |
|         | H-2    | -8.506                                                                         | 42.7(41.9d <sub>xz</sub> )                                                      | 9.9                   | 47.3                  |
|         | H-3    | -9.002                                                                         | 86.7(69.9d <sub>z</sub> <sup>2</sup> )                                          | 4.1                   | 9.2                   |
|         | H-4    | -9.199                                                                         | 6.0(2.3d <sub>z</sub> <sup>2</sup> + 2.0d <sub>xz</sub> )                       | 48.9                  | 45.0                  |
| Dimer   | L+6    | 0.808                                                                          | 20.2                                                                            | 31.7                  | 40.1                  |
|         | L+4    | 0.308                                                                          | 2.3                                                                             | 62.9                  | 27.1                  |
|         | L+1    | -0.552                                                                         | 3.3(2.6d <sub>xz</sub> )                                                        | 92.0                  | 4.1                   |
|         | L      | -1.455                                                                         | 7.8(3.6d <sub>xz</sub> )                                                        | 84.4                  | 6.3                   |
|         | H      | -6.792                                                                         | 2.2(2.1d <sub>yz</sub> )                                                        | 0.8                   | 95.7                  |
|         | H-1    | -6.973                                                                         | 1.6(0.6d <sub>xz</sub> +0.9d <sub>yz</sub> )                                    | 2.4                   | 95.0                  |
|         | H-2    | -7.632                                                                         | 60.6(46.7d <sub>z</sub> <sup>2</sup> +5.7d <sub>xz</sub> )                      | 1.8                   | 36.1                  |
|         | H-3    | -7.937                                                                         | 16.8(15.6d <sub>yz</sub> )                                                      | 2.3                   | 80.4                  |
|         | H-4    | -8.089                                                                         | 51.9(28.4 d <sub>z</sub> <sup>2</sup> +8.6d <sub>xz</sub> +7.2d <sub>yz</sub> ) | 9.4                   | 31.0                  |
| H-5     | -8.321 | 23.1(13.1d <sub>yz</sub> +6.0d <sub>z</sub> <sup>2</sup> +3.0d <sub>xz</sub> ) | 3.7                                                                             | 66.6                  |                       |
| H-6     | -8.493 | 23.4(21.1d <sub>xz</sub> )                                                     | 11.2                                                                            | 58.8                  |                       |
| H-7     | -9.046 | 30.8(23.6d <sub>yz</sub> +5.5d <sub>z</sub> <sup>2</sup> )                     | 29.8                                                                            | 38.6                  |                       |
| H-8     | -9.178 | 1.5                                                                            | 1.4                                                                             | 94.5                  |                       |

**Table S9.** The singlet and triplet excited state transition configurations of monomer 4.

| Isolated             | m-th | Energy (eV) | Transition configuration (%)                                                                |
|----------------------|------|-------------|---------------------------------------------------------------------------------------------|
| <b>S<sub>m</sub></b> | 1    | 3.40        | H→L (79.0), H→L+2 (7.3), H-2→L (5.8), H-1→L (4.0)                                           |
|                      | 2    | 4.09        | H-1→L (55.9), H-2→L (11.0), H-4→L (12.6), H→L (6.8)                                         |
|                      | 3    | 4.20        | H→L+3 (47.9), H-3→L (25.5), H-1→L+3 (10.4)                                                  |
|                      | 4    | 4.28        | H-4→L (62.2), H→L+3 (22.0)                                                                  |
|                      | 5    | 4.37        | H-3→L (51.0), H-2→L (20.2), H-9→L (9.0), H-3→L+3 (5.6)                                      |
|                      | 6    | 4.55        | H-3→L+3 (66.8), H→L+2 (6.6), H-1→L (5.8), H→L+4 (3.9)                                       |
|                      | 7    | 4.74        | H→L+2 (42.4), H→L+4 (15.7), H-3→L+3 (13.3), H-3→L+1 (10.0), H→L (6.6)                       |
|                      | 8    | 4.89        | H-7→L (12.9), H→L+1 (34.1), H-5→L (7.5), H-2→L (6.3), H→L+2 (6.1), H→L+4 (5.0), H-4→L (5.0) |
|                      | 9    | 4.91        | H-1→L+3 (41.2), H-2→L+3 (32.6)                                                              |
|                      | 10   | 4.99        | H→L+1 (20.8), H-1→L+3 (15.8), H-2→L+3 (11.9), H→L+3 (11.7)                                  |
| <b>T<sub>m</sub></b> | 1    | 2.73        | H→L (38.2), H→L+2 (35.0), H→L+4 (19.8)                                                      |
|                      | 2    | 3.21        | H-2→L (25.0), H-4→L (22.8), H-1→L (16.1)                                                    |
|                      | 3    | 3.56        | H-1→L (47.2), H-2→L (14.1), H-9→L (9.2)                                                     |

**Table S10.** The singlet and triplet excited state transition configurations of dimer.

| Isolated             | m-th | Energy (eV) | Transition configuration (%)                                           |
|----------------------|------|-------------|------------------------------------------------------------------------|
| <b>S<sub>m</sub></b> | 1    | 2.58        | H→L (85.2), H-3→L (5.0)                                                |
|                      | 2    | 2.61        | H-2→L (72.4), H-4→L (19.1)                                             |
|                      | 3    | 2.82        | H-1→L (81.8), H→L+1 (4.4), H-5→L (4.3)                                 |
|                      | 4    | 3.38        | H-3→L(56.5), H→7(20.7), H→L(7.9)                                       |
|                      | 5    | 3.43        | H-4→L (57.3), H-2→L (14.7), H-11→L (8.0), H→L+2 (4.8)                  |
|                      | 6    | 3.52        | H-2→L+1 (68), H-2→L+3 (13.0), H-2→L+3 (4.0)                            |
|                      | 7    | 3.63        | H-5→L (30.6), H→L+2 (18.0), H-1→L+1 (10.5), H-1→L+1 (8.5), H-4→L (6.7) |
|                      | 8    | 3.82        | H-5→L (20.7), H→L+2 (61.4)                                             |
|                      | 9    | 3.89        | H-6→L (35.4), H-1→L+1 (24.5), H→L+3 (16.3), H-4→L+1 (5.2)              |
|                      | 10   | 3.90        | H-6→L (21.3), H→L+3 (54.6), H-1→L+3 (4.5), H-4→L+1 (3.1)               |
| <b>T<sub>m</sub></b> | 1    | 2.41        | H-2→L (72.2), H-4→L (17.4)                                             |
|                      | 2    | 2.42        | H→L (70.8), H-3→L (5.0), H-7→L (3.8), H→L+6 (4.1)                      |
|                      | 3    | 2.60        | H-1→L (62.6), H-1→L+6 (4.9), H→L+2 (5.3)                               |
